# Supplementary material for: Facile one-pot synthesis of highly monodisperse nickel microspheres with raised nickel dots and their adsorption performance for heavy metal ions
Source: Royal Society of Chemistry journal article supplement (doi:10.1039/c6dt00794e), 2016-01-01
Supplement: c6dt00794e1.pdf [file c6dt00794e1.pdf]

# Supporting Information

## Facile One-Pot Synthesis of Highly Monodisperse Nickel Microspheres with Raised Nickel Dots and Their Adsorption Performance for Heavy Metal Ions

Yue Teng<sup>a</sup>, Le Xin Song<sup>a,b,\*</sup>, Wei Liu<sup>a,\*</sup>, Li Zhao<sup>b</sup>, Juan Xia<sup>c</sup>, Qing Shan Wang<sup>b</sup>, Mao Mao Ruan<sup>b</sup>, Zun Yang<sup>b</sup> and Yong Xin Qian<sup>b</sup>

<sup>a</sup> CAS Key Laboratory of Materials for Energy Conversion & Collaborative Innovation Center of Suzhou Nano Science and Technology, University of Science and Technology of China, Jin Zhai Road 96, Hefei, China 230026, E-mail: wliu@ustc.edu.cn;.

<sup>b</sup> Department of Chemistry, University of Science and Technology of China, Jin Zhai Road 96, Hefei 230026, China. E-mail: solexin@ustc.edu.cn; Fax: +86-551-63601592;

<sup>c</sup> School of Chemistry and Chemical Engineering, Fuyang Normal College, Fuyang Anhui 236037, China.

### A list of the contents for all the supporting information

| Pages | Contents                                                                                                                                                                                                                                                                                        |
|-------|-------------------------------------------------------------------------------------------------------------------------------------------------------------------------------------------------------------------------------------------------------------------------------------------------|
| 1     | A table of contents page.                                                                                                                                                                                                                                                                       |
| 2     | <b>Fig. S1</b> The size distribution of the Ni microspheres.                                                                                                                                                                                                                                    |
| 3     | <b>Fig. S2</b> XRD patterns (A) of the Ni materials obtained from solvothermal processes at 10 (a), 15 (b), 18 (c) and 20 h (d); SEM images of the Ni materials obtained from solvothermal processes at 10 (B), 15 (C), 18 (D) and 20 h (E).                                                    |
| 4     | <b>Fig. S3</b> (A) XRD patterns of the solvothermal products when the molar ratio of NATH to urea is 1:2 (a), 1:1 (b) and 2.5:1 (c); (B, C, D) SEM images of the solvothermal products when the molar ratio of NATH to urea is 1:2 (B), 1:1 (C) and 2.5:1 (D).                                  |
| 5     | <b>Fig. S4</b> (A) XRD patterns of the solvothermal products when the molar ratio of NATH to urea is 1:0 (a) and 3:1 (b); (B, C) SEM images of the solvothermal products when the molar ratio of NATH to urea is 1:0 (B) and 3:1 (C). The green asterisks represent the formation of the Ni-EG. |
| 6     | <b>Fig. S5</b> The XRD pattern of the solvothermal product when the molar ratio of NaOH to urea is 2:1. The green asterisks represent the formation of the Ni-EG.                                                                                                                               |
| 7     | <b>Fig. S6</b> The XRD pattern of the solvothermal products when the reaction temperature is 413 K. The green asterisks represent the formation of the Ni-EG.                                                                                                                                   |
| 8     | <b>Fig. S7</b> The XRD pattern of the solvothermal product when the reaction temperature is 433 K. The green asterisks represent the formation of the Ni-EG.                                                                                                                                    |
| 9     | <b>Fig. S8</b> The XRD pattern and SEM image of the solvothermal product when the reaction temperature is 473 K.                                                                                                                                                                                |
| 10    | <b>Table S1.</b> Comparison of magnetic properties of the Ni microspheres with other Ni materials in literature.                                                                                                                                                                                |
| 11    | <b>Fig. S9</b> Temperature dependence of magnetization for the Ni microspheres. The curve was recorded at 100 Oe.                                                                                                                                                                               |
| 12    | <b>Fig. S10</b> The N <sub>2</sub> adsorption-desorption isotherm and pore size distribution of the Ni microspheres.                                                                                                                                                                            |
| 13    | <b>Table S2.</b> Comparison of adsorption activity of different materials for removal of Cd <sup>2+</sup> .                                                                                                                                                                                     |
| 14    | <b>Fig. S11</b> EDS images of the Ni microspheres after adsorption of Cd <sup>2+</sup> (C <sub>0</sub> , 3000 mg·L <sup>-1</sup> ).                                                                                                                                                             |
| 15    | <b>Fig. S12</b> Schematic drawing describing the proposed coordination bridging adsorption process of Cd <sup>2+</sup> ions on the Ni microspheres.                                                                                                                                             |
| 16    | <b>Fig. S13</b> The adsorption isotherm of Cd <sup>2+</sup> ions on the Ni microspheres (0.5 g·L <sup>-1</sup> ) using Cd(NO <sub>3</sub> ) <sub>2</sub> instead of CdCl <sub>2</sub> .                                                                                                         |
| 17    | <b>Fig. S14</b> Ni 2p <sub>1/2</sub> and 2p <sub>3/2</sub> , Cd 3d <sub>3/2</sub> and 3d <sub>5/2</sub> and Cl 2p <sub>1/2</sub> and 2p <sub>3/2</sub> XPS spectra on the Ni microspheres after adsorption treatment.                                                                           |
| 18    | <b>Fig. S15</b> The adsorption isotherm of Cd <sup>2+</sup> ions on the Ni microspheres (0.5 g·L <sup>-1</sup> , red line) and a Ni material with a low density of Ni dots (0.5 g·L <sup>-1</sup> , black line).                                                                                |
| 19    | <b>Fig. S16</b> The adsorption isotherm of Zn <sup>2+</sup> ions on the Ni microspheres (0.5 g·L <sup>-1</sup> ) using ZnCl <sub>2</sub> .                                                                                                                                                      |
| 20    | <b>Fig. S17</b> The adsorption isotherm of Hg <sup>2+</sup> ions on the Ni microspheres (0.5 g·L <sup>-1</sup> ) using HgCl <sub>2</sub> .                                                                                                                                                      |

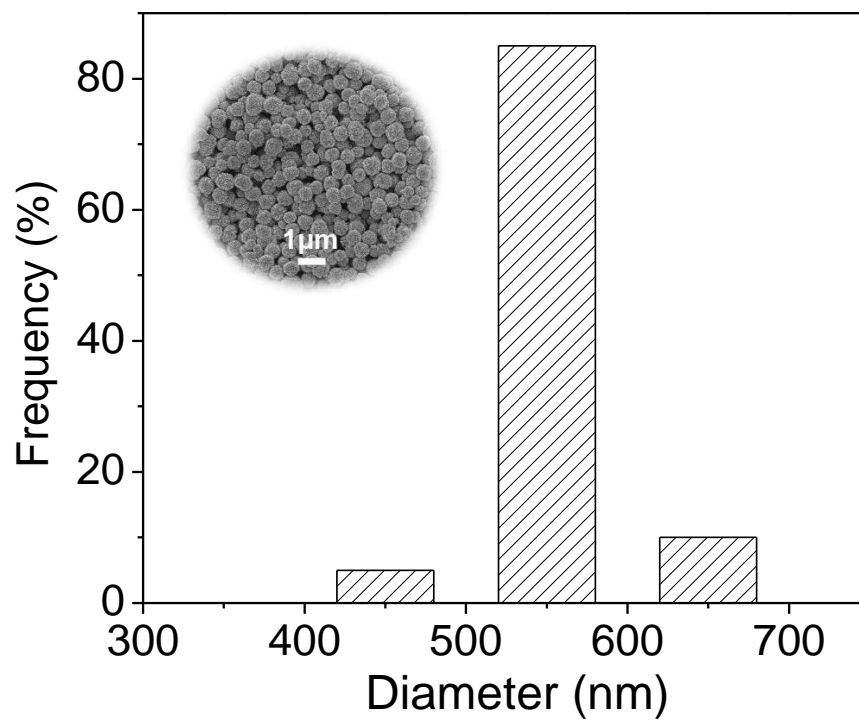

**Fig. S1** The size distribution of the Ni microspheres (about 180 particles were measured and counted in the inset).

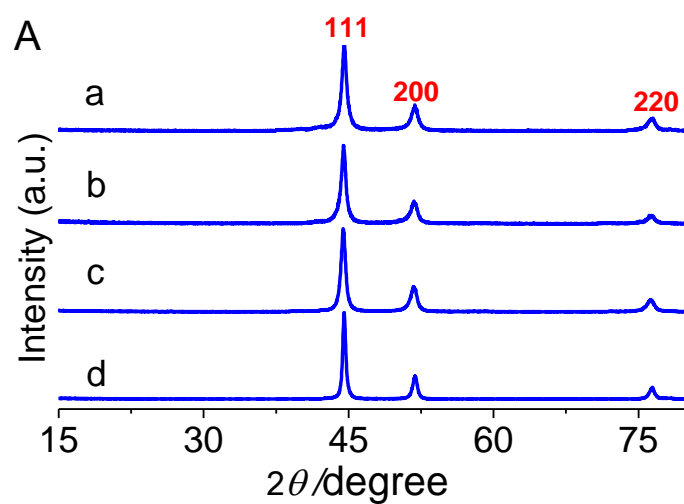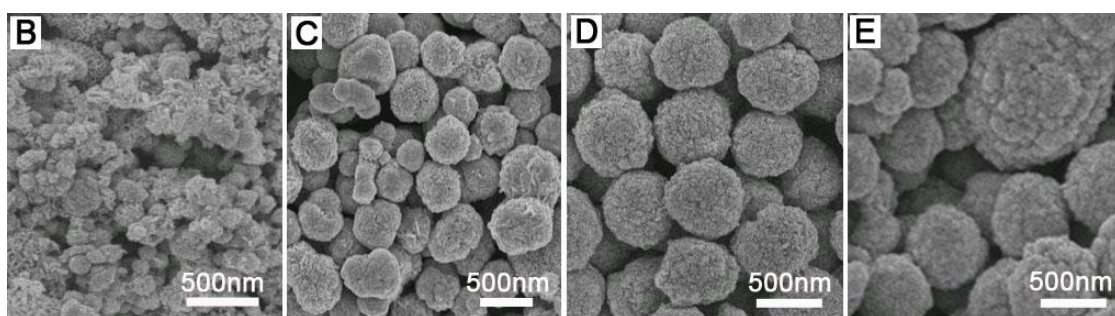

**Fig. S2** XRD patterns (A) of the Ni materials obtained from solvothermal processes at 10 (a), 15 (b), 18 (c) and 20 h (d); SEM images of the Ni materials obtained from solvothermal processes at 10 (B), 15 (C), 18 (D) and 20 h (E).

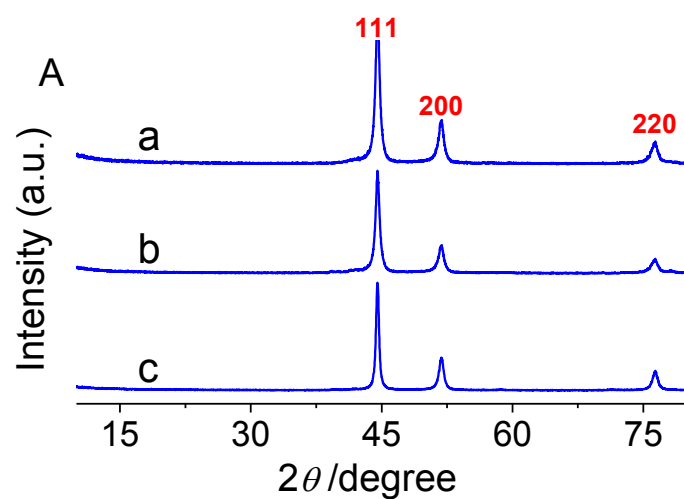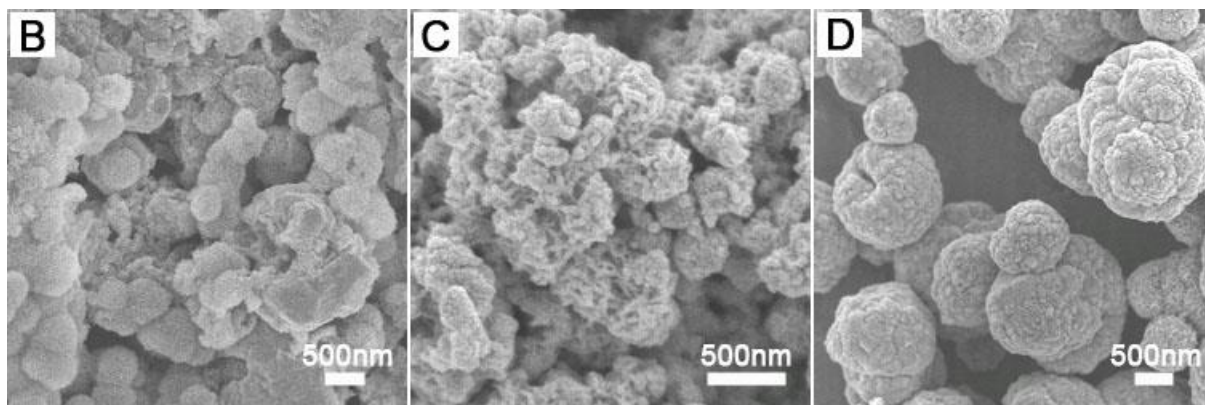

**Fig. S3** (A) XRD patterns of the solvothermal products when the molar ratio of NATH to urea is 1:2 (a), 1:1 (b) and 2.5:1 (c); (B, C, D) SEM images of the solvothermal products when the molar ratio of NATH to urea is 1:2 (B), 1:1 (C) and 2.5:1 (D).

The X-ray diffraction (XRD) in **Fig. S4** shows that the products, obtained with the 1:0 and 3:1 initial molar ratios of NATH to urea, have a strong characteristic peak at around  $10^\circ$  and several small peaks, which were marked with green asterisks. These peaks do not belong to the characteristic peaks of Ni, but they can be indexed to pure Ni-EG complex according to the results reported before.<sup>1,2</sup> This observation indicated that some  $\text{Ni}^{2+}$  ions were reacted with EG to form Ni-EG and the complex coexisted in the two samples of Ni.

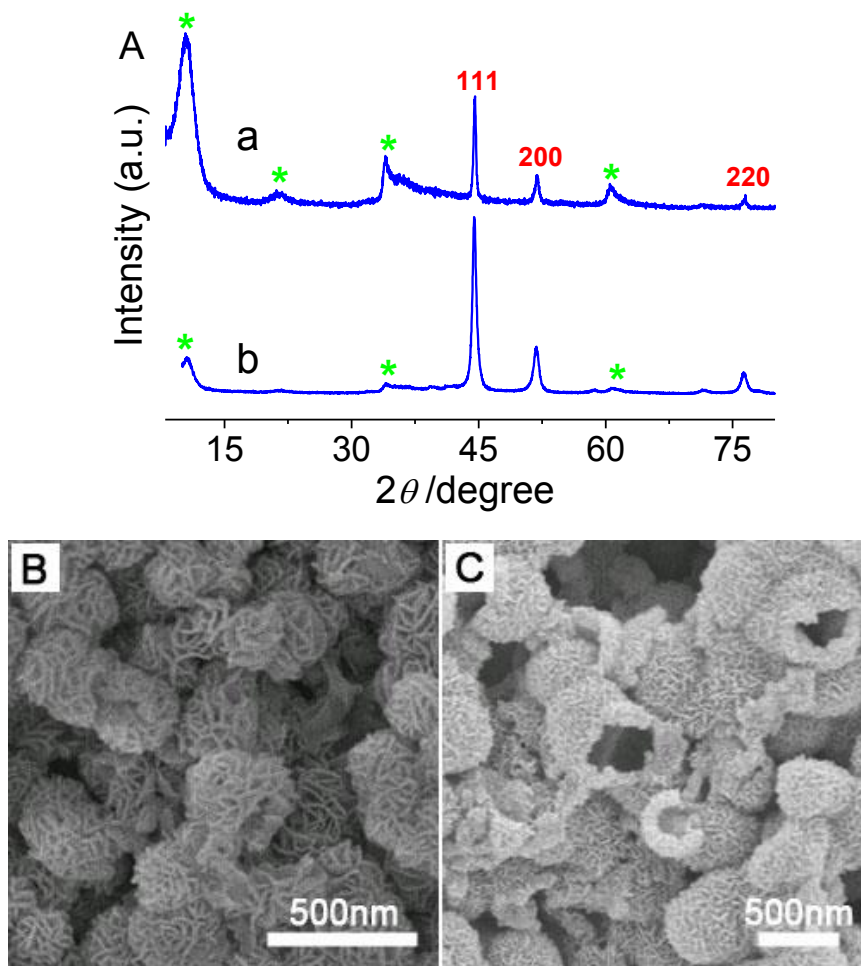

**Fig. S4** (A) XRD patterns of the solvothermal products when the molar ratio of NATH to urea is 1:0 (a) and 3:1 (b); (B, C) SEM images of the solvothermal products when the molar ratio of NATH to urea is 1:0 (B) and 3:1 (C). The green asterisks represent the formation of the Ni-EG.

## Reference

- (a) D. Khushalani, O. Dag, G. A. Ozin and A. Kuperman, *J. Mater. Chem.*, 1999, **9**, 1491. (b) F. F. Tao, M. Y. Guan, Y. M. Zhou, L. Zhang, Z. Xu and J. Chen, *Cryst. Growth Des.*, 2008, **8**, 2157. (c) L. S. Zhong, J. S. Hu, H. P. Liang, A. M. Cao, W. G. Song and L. J. Wan, *Adv. Mater.*, 2006, **18**, 2426.
- (a) X. C. Jiang, Y. L. Wang, T. Herricks and Y. N. Xia, *J. Mater. Chem.*, 2004, **14**, 695. (b) Y. L. Wang, X. C. Jiang and Y. N. Xia, *J. Am. Chem. Soc.*, 2003, **125**, 16176. (c) R. W. J. Scott, N. Coombs, L. J. Wan and G. A. Ozin, *J. Mater. Chem.*, 2003, **13**, 969.

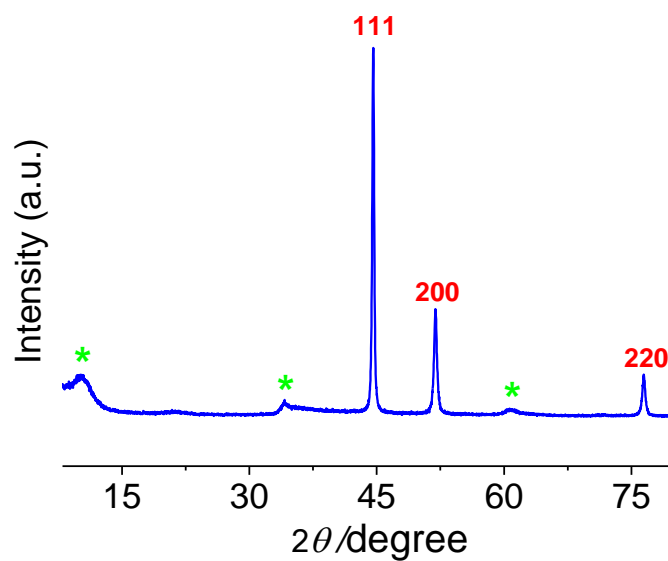

**Fig. S5** The XRD pattern of the solvothermal product when the molar ratio of NaOH to urea is 2:1. The green asterisks represent the formation of the Ni-EG.

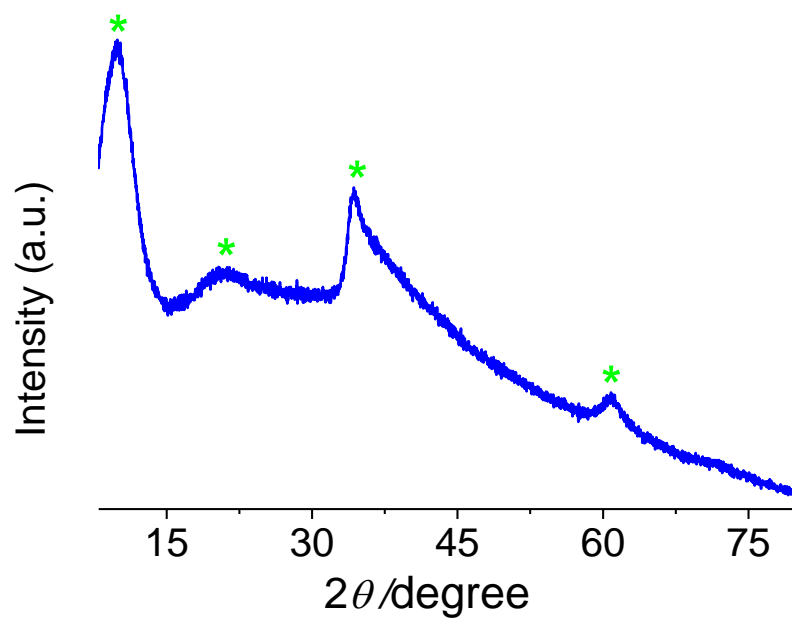

**Fig. S6** The XRD pattern of the solvothermal product when the reaction temperature is 413 K. The green asterisks represent the formation of the Ni-EG.

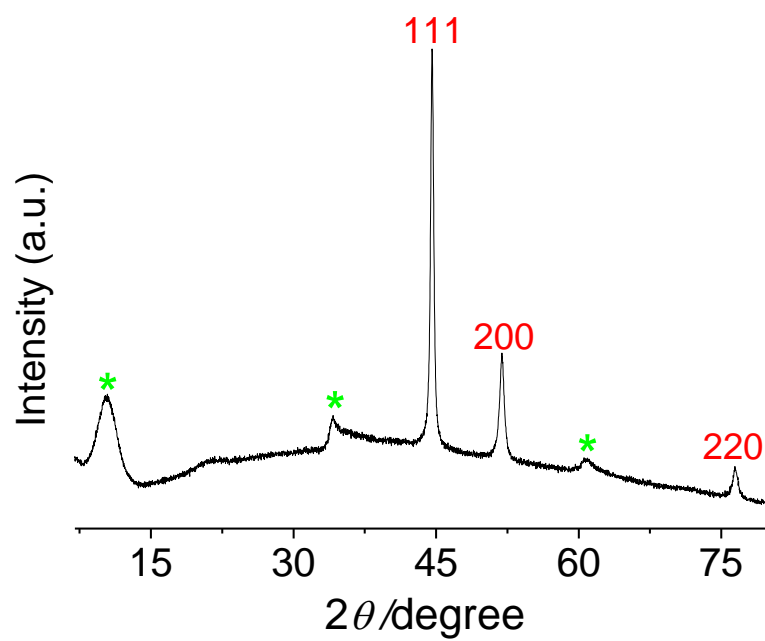

**Fig. S7** The XRD pattern of the solvothermal product when the reaction temperature is 433 K. The green asterisks represent the formation of the Ni-EG.



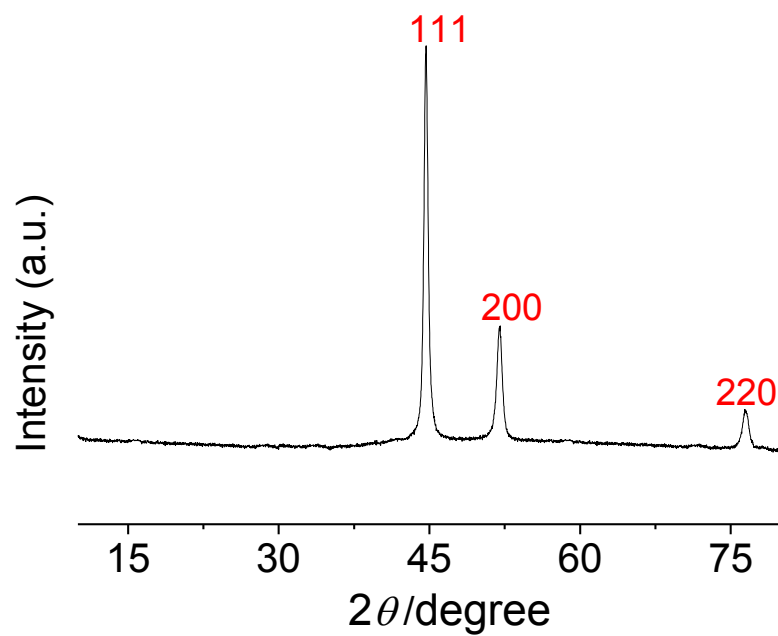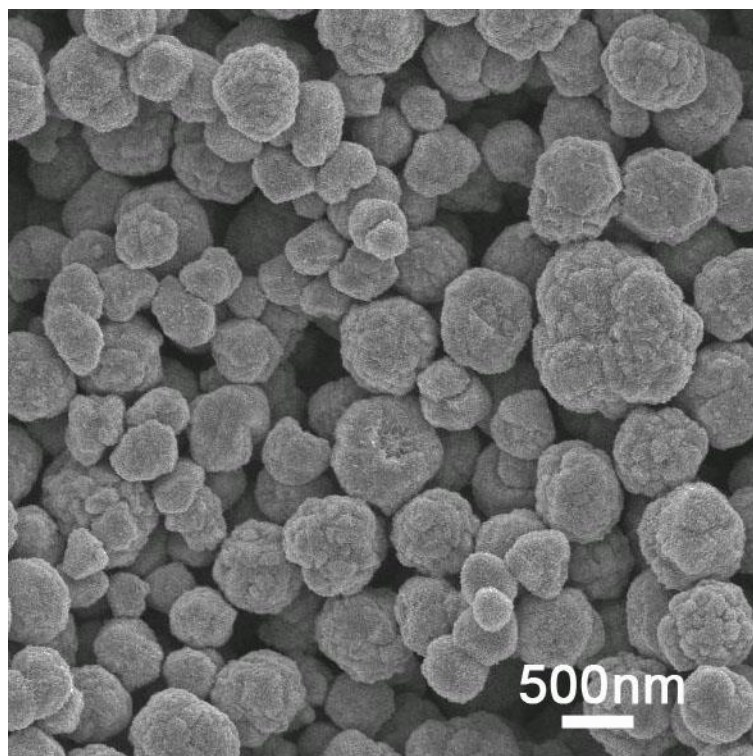

**Fig. S8** The XRD pattern and SEM image of the solvothermal product when the reaction temperature is 473 K.

**Table S1.** Comparison of magnetic properties of the Ni microspheres with other Ni materials in literature.

| Materials                          | Size (nm) | Saturation magnetization (emu·g <sup>-1</sup> ) | Remnant Magnetization (emu·g <sup>-1</sup> ) | Coercivity Values (Oe) | Temperature (K) | Reference        |
|------------------------------------|-----------|-------------------------------------------------|----------------------------------------------|------------------------|-----------------|------------------|
| Ni microspheres                    | 550       | 35.8                                            | 13.6                                         | 244                    | 5               | The present work |
|                                    | 550       | 40.4                                            | 4.2                                          | 90                     | 300             |                  |
| hollow Ni spheres                  | 300-450   | 21.1                                            | 0.69                                         | 32.3                   | 300             | 3                |
| Ni@C honeycomb like nanostructures | 500       | 13                                              | /                                            | 124.2                  | 300             | 4                |
| bulk Ni                            | 2000-3000 | 55                                              | 2.7                                          | 0.7                    | 300             | 5                |

### Reference

3. J. C. Bao, Y. Y. Liang, Z. Xu, L. Si, *Adv. Mater.*, 2003, **15**, 1832.
4. Y. H. Ni, L. N. Jin, L. Zhang, J. M. Hong, *J. Mater. Chem.*, 2010, **20**, 6430.
5. J. C. Bao, C. Y. Tie, Z. Xu, Q. F. Zhou, D. Shen, Q. Ma, *Adv. Mater.*, 2001, **13**, 1631.

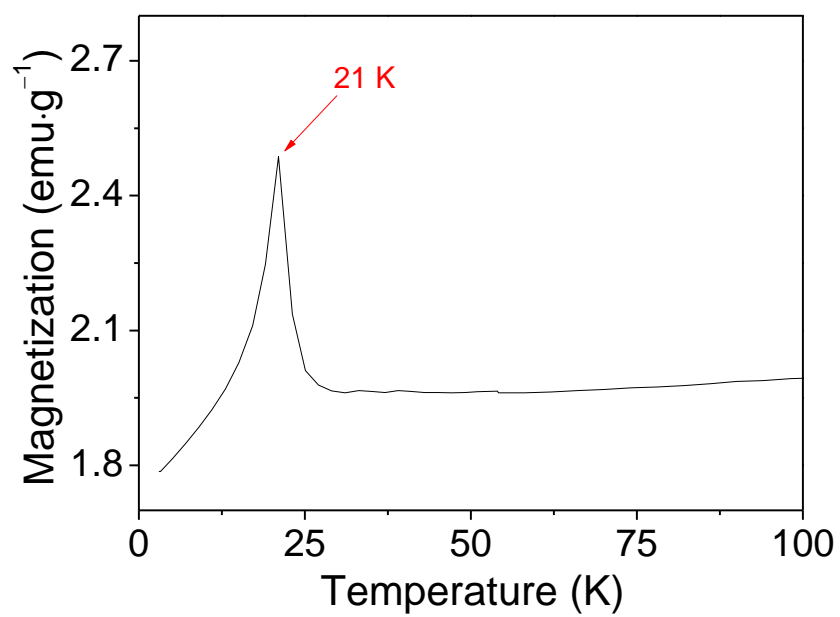

**Fig. S9** The temperature dependence of magnetization for the Ni microspheres. The curve was recorded at 100 Oe.

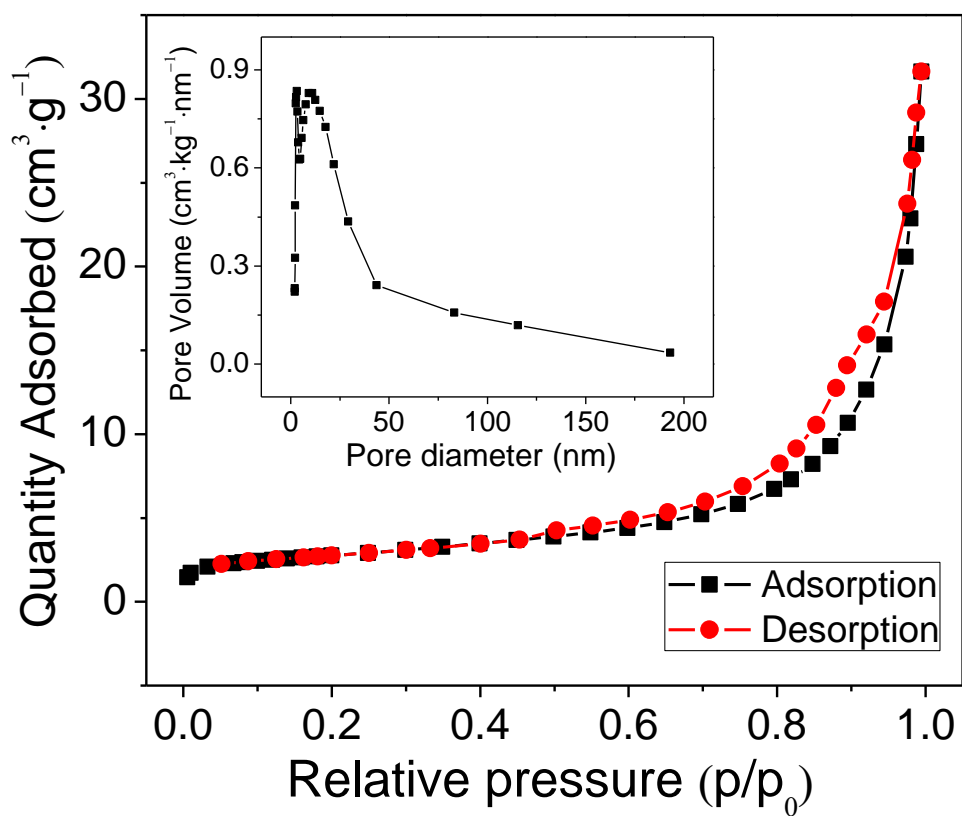

**Fig. S10** The  $N_2$  adsorption-desorption isotherm and pore size distribution of the Ni microspheres.

**Table S2.** Comparison of adsorption activity of different materials for removal of Cd<sup>2+</sup>.

| Materials            | Catalyst (mg) | C <sub>0</sub> (Cd <sup>2+</sup> mg/L) | Volume (Cd <sup>2+</sup> /mL) | C <sub>e</sub> (Cd <sup>2+</sup> /mL) | q <sub>e</sub> (mg·g <sup>-1</sup> ) | η (%) | Reference        |
|----------------------|---------------|----------------------------------------|-------------------------------|---------------------------------------|--------------------------------------|-------|------------------|
| Ni microspheres      | 10            | 12                                     | 20                            | 3.86                                  | 16.28                                | 68    | The present work |
|                      | 10            | 60                                     | 20                            | 32.57                                 | 54.86                                | 46    | The present work |
|                      | 10            | 600                                    | 20                            | 100.00                                | 1000.00                              | 84    | The present work |
| Ni-P microstructures | 10            | 10                                     | 50                            | 1.86                                  | 40.7                                 | 81.4  | 6                |
|                      | 10            | 50                                     | 50                            | 28                                    | 110                                  | 44    | 6                |
| Ni@C nanostructures  | 20            | 10                                     | 50                            | 4.7                                   | 6.43                                 | 53    | 7                |

### Reference

6. Y. H. Ni, K. Mi, C. Cheng, J. Xia, X. Ma, J. M. Hong, *Chem. Commun.* 2011, **47**, 5891.
7. Y. Ni, L. Jin, L. Zhang and J. Hong, *J. Mater. Chem.*, 2010, **20**, 6430.

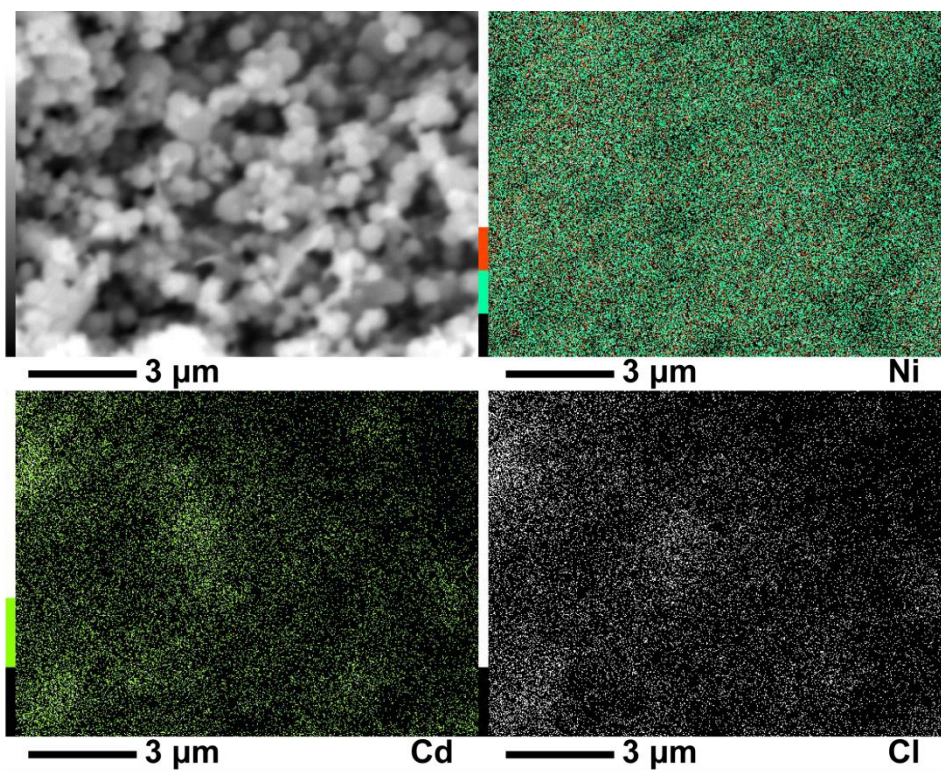

**Fig. S11** EDS images of the Ni microspheres after adsorption of  $\text{Cd}^{2+}$  ( $C_0$ ,  $3000 \text{ mg}\cdot\text{L}^{-1}$ ).

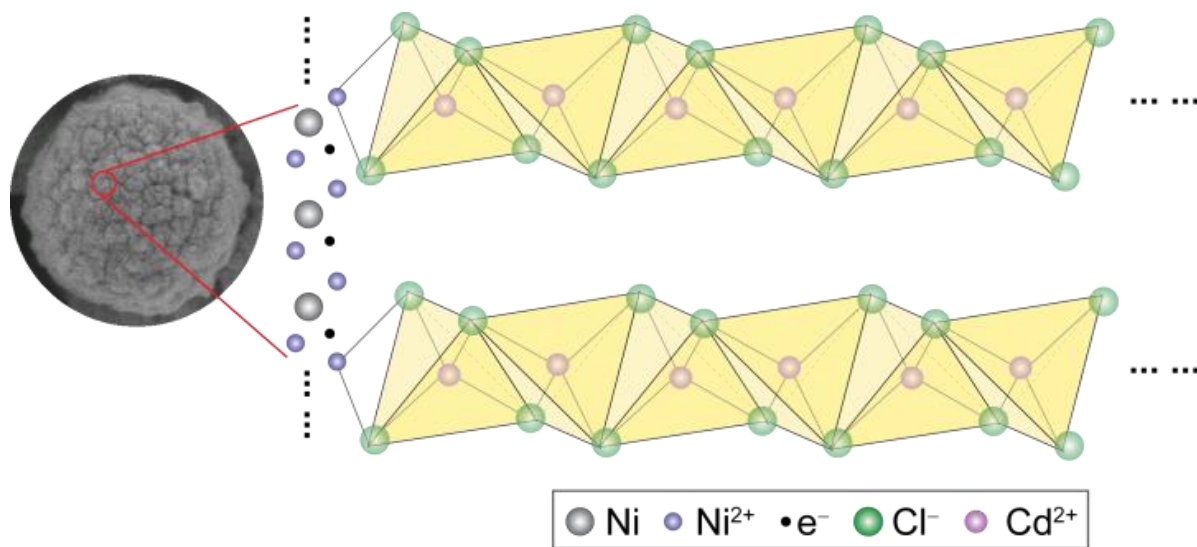

**Fig. S12** Schematic drawing describing the proposed coordination bridging adsorption process of Cd<sup>2+</sup> ions on the Ni microspheres.

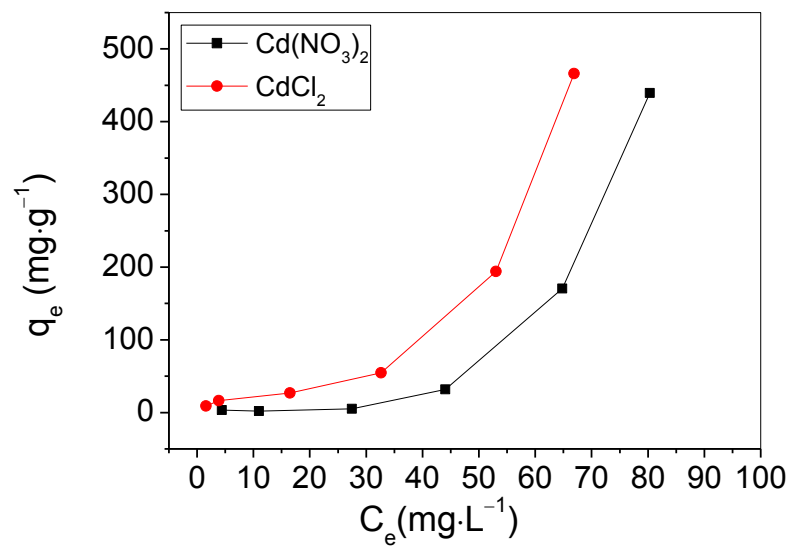

**Fig. S13** The adsorption isotherm of Cd<sup>2+</sup> ions on the Ni microspheres (0.5 g·L<sup>-1</sup>) using Cd(NO<sub>3</sub>)<sub>2</sub> instead of CdCl<sub>2</sub>.



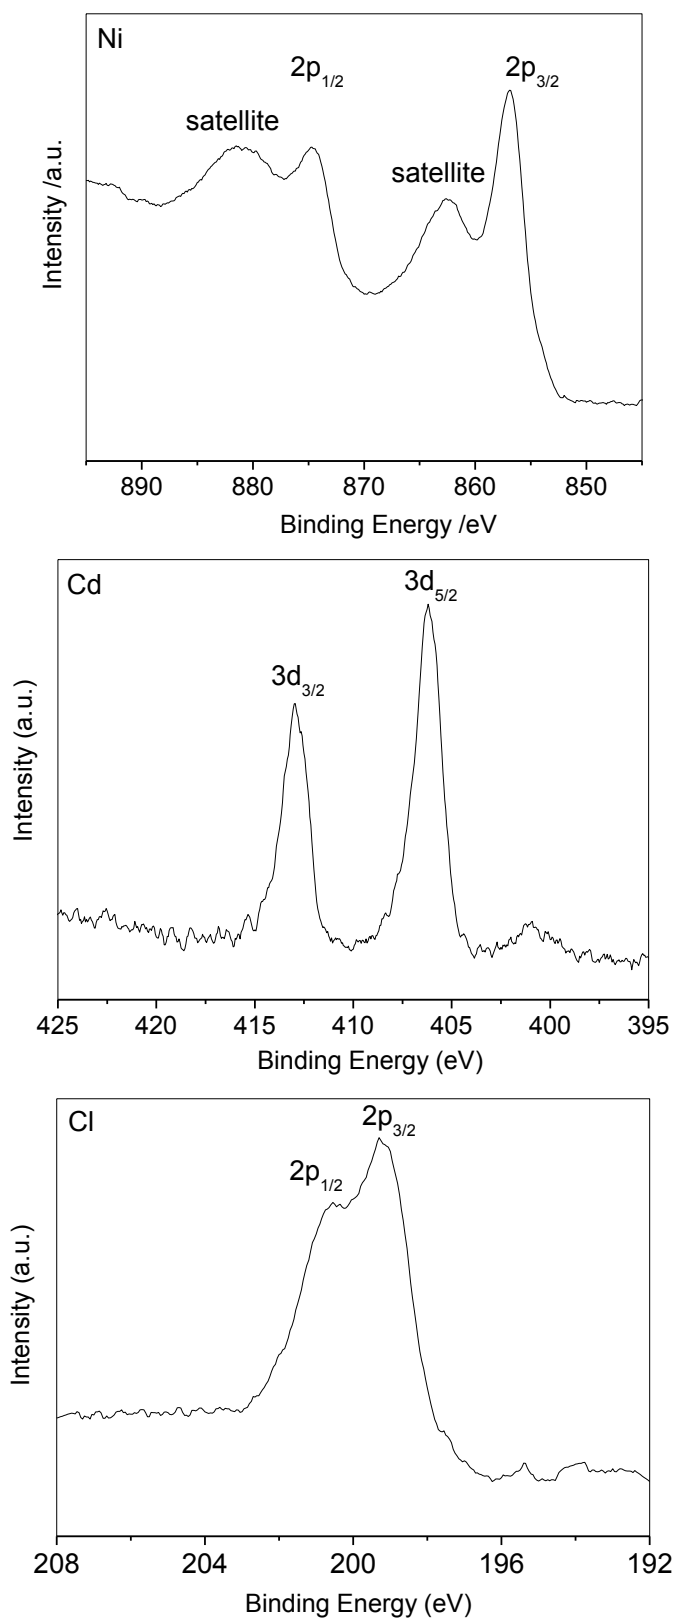

**Fig. S14** Ni  $2p_{1/2}$  and  $2p_{3/2}$ , Cd  $3d_{3/2}$  and  $3d_{5/2}$  and Cl  $2p_{1/2}$  and  $2p_{3/2}$  XPS spectra on the Ni microspheres after adsorption treatment.

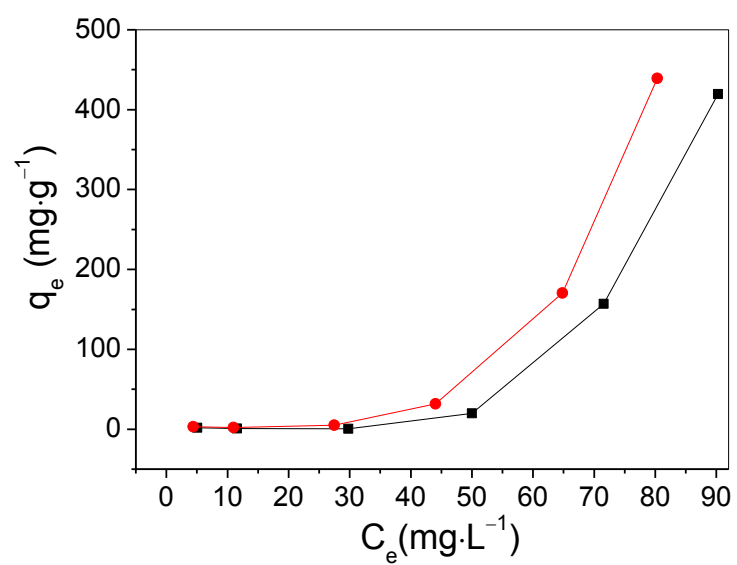

**Fig. S15** The adsorption isotherm of  $\text{Cd}^{2+}$  ions on the Ni microspheres ( $0.5 \text{ g}\cdot\text{L}^{-1}$ , red line) and a non-uniform Ni material with a low density of Ni dots ( $0.5 \text{ g}\cdot\text{L}^{-1}$ , black line).

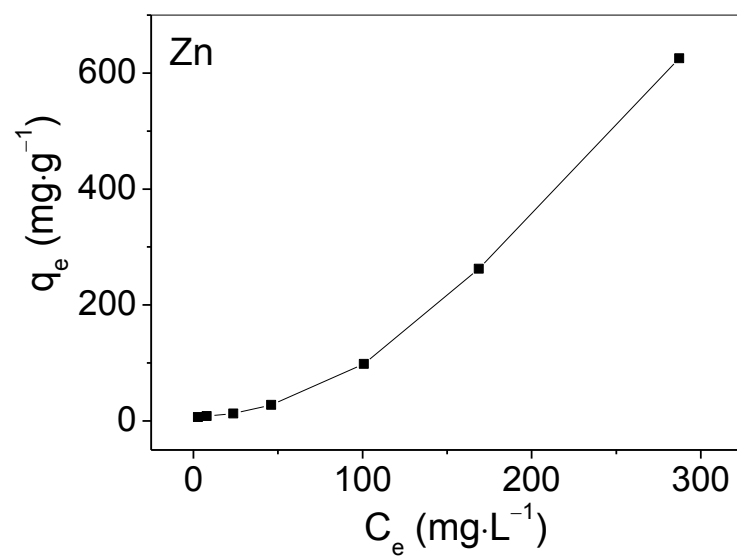

**Fig. S16** The adsorption isotherm of Zn<sup>2+</sup> ions on the Ni microspheres (0.5 g·L<sup>-1</sup>) using ZnCl<sub>2</sub>.

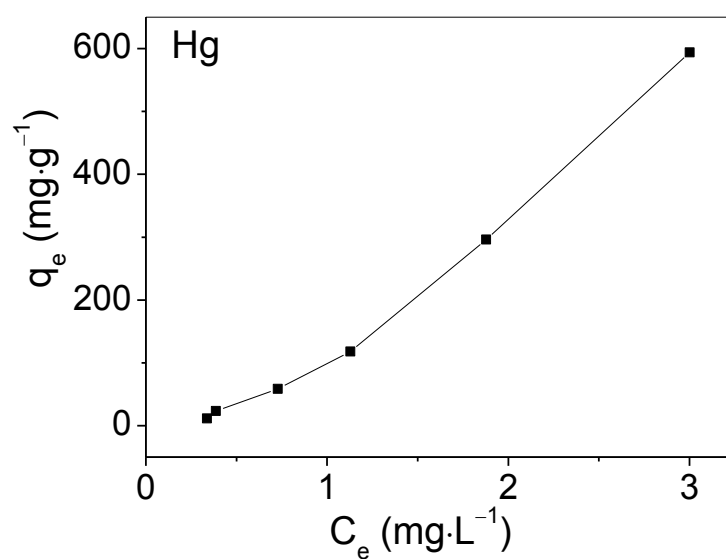

**Fig. S17** The adsorption isotherm of Hg<sup>2+</sup> ions on the Ni microspheres (0.5 g·L<sup>-1</sup>) using HgCl<sub>2</sub>.
